# Supplementary material
Source: PubMed Central journal article supplement (PMC4115189)

## SUPPLEMENTAL DATA

## Supplementary figure legends

## Supplementary figure 1

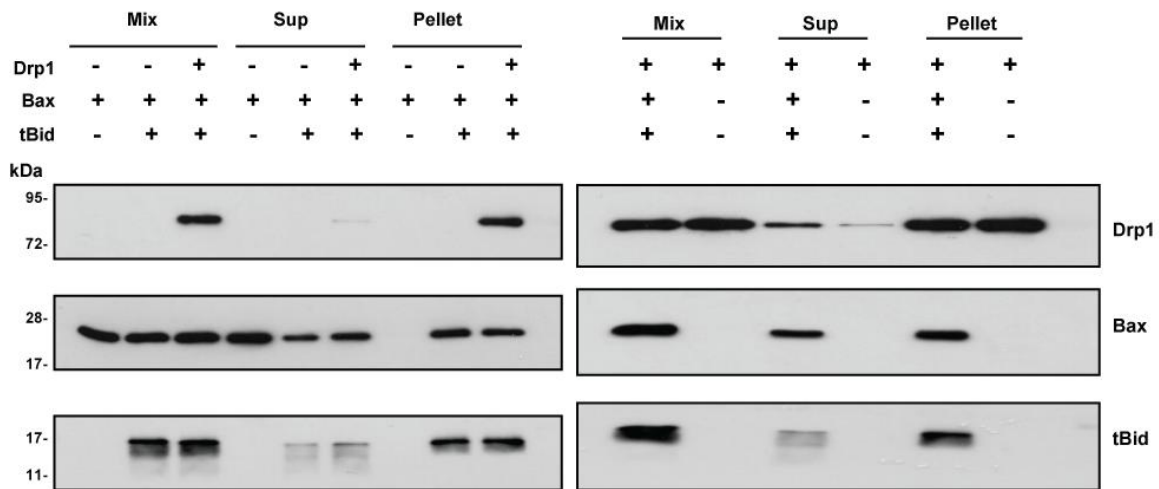

**Figure S1: Binding of tBid, Drp1 and Bax to liposomes, related to Figure 2B**

PC/PE/CL liposomes were incubated in the presence of 500 nM Drp1, 50 nM Bax and/or 10 nM tBid in 300  $\mu$ l KCl buffer, as indicated in the figure. 50  $\mu$ l of the suspension (called Mix) was removed for further immunoblotting and replaced by 50  $\mu$ l KCl buffer. Liposomes were then ultracentrifuged and the pellet was resuspended in 300  $\mu$ l KCl buffer. 50  $\mu$ l of the Mix, Supernatant (Sup) and Pellet were analyzed by immunoblotting using antibodies to Bid, Bax or Drp1. This allowed a direct comparison of the proportion of the proteins that bound to liposomes or remained in suspension.

## Supplementary figure 2

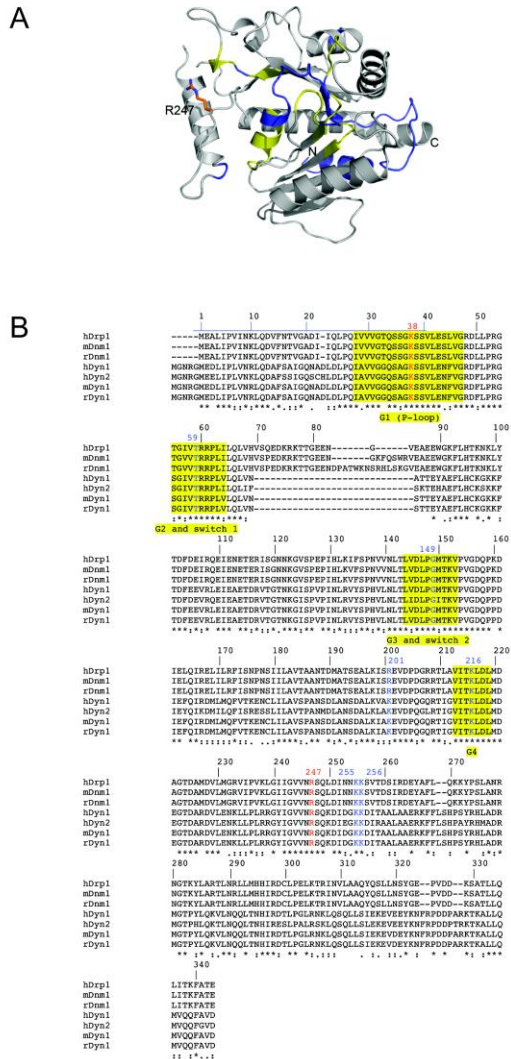

**Figure S2. Arginine 247 of Drp1, related to Figure 2D-E**

(A) Homology model of the hDrp1 GTPase domain (amino acids 1-313) based on the Dynamin-1 GTPase domain (2aka.pdb, sequence identity 57%) shown in cartoon representation. Regions involved in GTP-binding and hydrolysis are in yellow. Amino acids mutated in hDrp1 without a loss of capacity to stimulate Bax oligomerization are in blue; R247 is shown in red sticks. Models were prepared using the FFAS server (<http://ffas.ljcrf.edu/>) and PYMOL (DeLano scientific).

(B) Sequence alignment of Drp1 and dynamins 1 and 2. The protein sequences of the GTPase domains of human, mouse and rat Drp1 (respectively hDrp1, mDnm1 and rDnm1), human dynamins 1 and 2 (hDyn1 and hDyn2) and mouse and rat dynamins 1 (mDyn1 and rDyn1) were aligned using the T-Coffee software ([www.ebi.ac.uk/t-coffee/](http://www.ebi.ac.uk/t-coffee/)). Numbering corresponds to the sequence of hDrp1. GTP-binding motifs are outlined in yellow. Deletion of the N-terminal segment of hDrp1 or point mutation of residues important for GTP binding and hydrolysis (in blue) did not reduce the capacity of hDrp1 to promote tBid-induced Bax oligomerization, unlike mutation of R247 (in red).

Supplementary figure 3

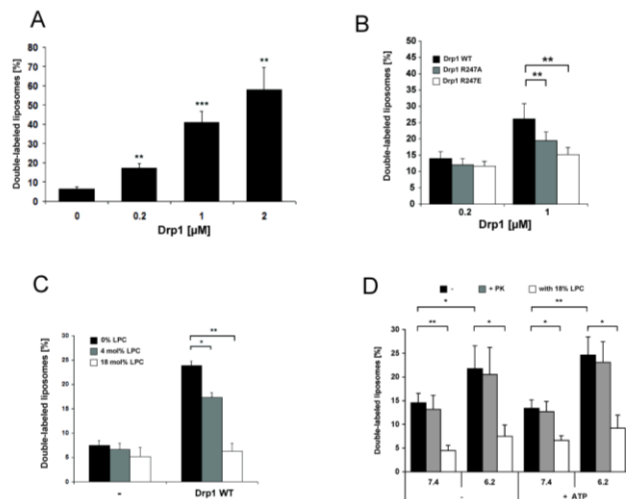

**Figure S3: Membrane hemifusion assessed by FACS, related to Figure 4**

(A) Single-labeled PC/PE/CL liposomes containing either Rhodamine-PE or Bodipy-FL C5 HPC were mixed and incubated with 2 mM ATP and increasing concentrations of Drp1. Liposomes were then treated with proteinase K before analysis by flow cytometry. \*:  $p < 0.02$ ; \*\*:  $p < 0.006$ ; \*\*\*:  $p < 0.0005$  (Values are means of more than three experiments  $\pm$  SEM).

(B) Effects of Drp1 WT (black bars), Drp1 R247A (grey bars) or Drp1 R247E (white bars) on liposome hemifusion. Values are means of more than four independent experiments  $\pm$  SEM; \*:  $p < 0.02$ ; \*\*:  $p < 0.01$ .

(C) PC/PE/CL liposomes containing 0% (black bars), 4 mol% (grey bars) or 18 mol% (white bars) LPC were assayed for Drp1-induced membrane hemifusion. Values are means of four independent experiments  $\pm$  SEM; \*:  $p < 0.04$ ; \*\*:  $p < 0.01$ .

(D) Membrane hemifusion induced by cytochrome c. Single-labeled PC/PE/CL liposomes were incubated with cytochrome c (0.25 mg/ml), in the absence or presence of ATP (2.5 mM), at pH 6.2 or 7.4. At pH 6.2, cytochrome c induced a significant increase in the fraction of double-labeled liposomes, suggesting membrane hemifusion (black bars). The fraction of double-labeled liposomes was not reduced after incubation with proteinase K (grey bars). In the presence of 18% LPC, cytochrome c did not induce liposome hemifusion (white bars). Values are means of three or more independent experiments  $\pm$  SEM; \*:  $p < 0.04$ ; \*\*:  $p < 0.007$ .

## Supplementary figure 4

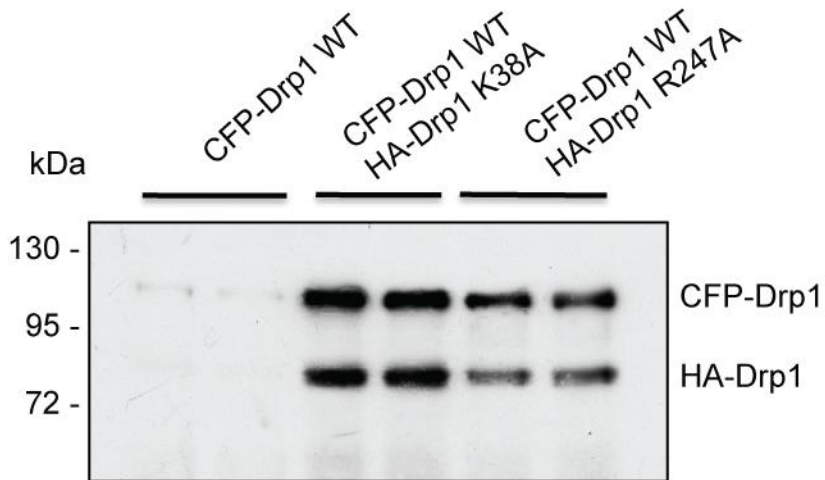

**Figure S4: Drp1 R247A and Drp1 WT interact in HeLa cells, related to Figure 5B**

HeLa cells were transfected with equal amounts of plasmids encoding HA-Drp1 R247A and CFP-tagged Drp1 WT or HA-Drp1 K38A and CFP-tagged Drp1 WT or with CFP-Drp1 WT alone. 48 hours after transfection, mitochondria were isolated, lysed in PBS pH 7.5, 2% CHAPS and HA-Drp1 was immunoprecipitated using an anti-HA antibody. The immunoprecipitate was analyzed by immunoblotting using an antibody directed against Drp1. Drp1 K38A was used as a positive control. This dominant negative mutant displays an impaired GTPase activity and is known to heterodimerize with endogenous Drp1.

## Supplementary figure 5

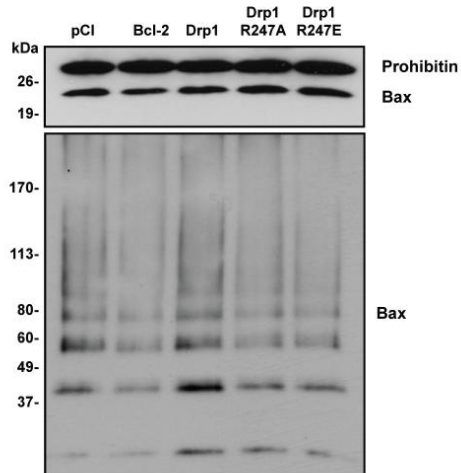

**Figure S5: Bax oligomerization assessed by cross-linking. Related to figure 6E**

HeLa cells were transfected with an empty pCI vector or with vectors encoding Bcl-2, Drp1 WT or Drp1 R247A/E. 72 h later cells were treated with 3  $\mu$ M ActD for 4 h before isolation of mitochondria, addition of cross-linkers, and Bax immunostaining. This blot is representative of six independent experiments. The amount of Bax attached to mitochondria before addition of the cross-linkers is shown in the upper blot, together with Prohibitin used as a loading control.

## **Experimental procedures**

**Preparation of cytosolic extracts.** Rat tissues were homogenized with a Dounce homogenizer in 35 mM PIPES buffer pH 7.4 containing 35 mM KOH, 5 mM MgCl<sub>2</sub>, 1 mM EGTA, 0.5 mM EDTA, 1 mM PMSF, 1 mM benzamidine, 1 mM DTT and 0.5 mM ATP. The homogenate was then centrifuged at 2'000 g, 4°C for 10 min and twice 1 h at 100'000 g at 4°C.

HeLa cells were resuspended in MB buffer (210 mM mannitol, 70 mM sucrose, 1 mM EDTA, 10 mM HEPES pH 7.4), broken by at least 10 passages through a 25G1 0.5 × 25 needle fitted on a 5-ml syringe and centrifuged at 100'000 g for 30 min at 4°C.

**Recombinant proteins.** Recombinant His-tagged full length Bax and caspase-8-cleaved Bid (tBid) were purified as described previously (Desagher et al., 1999; Eskes et al., 1998). C-terminal 6xHis-tagged wild-type and mutant recombinant Drp1 (Isoform 3, Uniprot KB/Swiss-Prot O00429) were produced in *Escherichia coli* Rosetta cells. Cells were grown in LB media containing 30 µg/ml kanamycin at 37°C to reach an OD<sub>600</sub> of 0.6, incubated in the presence of 0.2 mM isopropyl β-D-thiogalactopyranoside and harvested by centrifugation. The pellets were suspended in 25 mM HEPES pH 7.4, 1 mM PMSF/benzamidine, 5 mM β-mercaptoethanol, 300 mM KCl, 1 mM MgCl<sub>2</sub>, 10% (v/v) glycerol, 25 mM imidazole, DNase (1 µg/ml), and lysozyme (10 µg/ml), and incubated on ice for 30 min. The cells were then broken with a French press and centrifuged at 20'000 g for 15 min. The supernatants were affinity purified on a Ni-NTA agarose resin (Qiagen). The protein was eluted with 150 mM imidazole and dialyzed with 25 mM

Hepes-KOH pH 7.5, 125 mM KCl, 1 mM PMSF/benzamidine, 1 mM DTT and 10% (v/v) glycerol.

**Partial purification of Bax-activating factors.** Cytosolic extracts were loaded on an S Sepharose Fast Flow column (Amersham Pharmacia) and the activity was recovered in the flow-through which was concentrated using an Amicon membrane before further processing. Bax-activating factors were further purified by size exclusion chromatography performed with a Superose 6 column (Amersham Pharmacia). A 120 ml run in 25 mM Hepes-KOH pH 7.4, 200 mM KCl, 0.1 mM PMSF, 0.1 mM benzamidine, 1 mM DTT was performed and 2 ml fractions were recovered. Pools of 4 consecutive fractions were made and tested in the '2 step' Bax oligomerization assay.

**Preparation of salt-extracted mitochondrial proteins.** Mitochondria from rat liver were purified as described by Eskes et al., (1998) and were incubated in KCl buffer (500 mM KCl, 4 mM MgCl<sub>2</sub>, 5 mM KH<sub>2</sub>PO<sub>4</sub>, 10 mM Hepes-KOH pH 7.4) at 4°C for 30 min before centrifugation at 10'000 g. The supernatant was dialysed in 125 mM KCl buffer.

**Size exclusion chromatography.** Liposomes or mitochondria (250 µg) isolated from HeLa cells were lysed in 2% CHAPS and the insoluble material was removed by centrifugation (100'000 g for 30 min). The supernatant was loaded on a sephacryl S200 column (Amersham Pharmacia). A 130 ml run in 25 mM Hepes pH 7.5, 200 mM NaCl, 1% CHAPS, 2 mM DTT was performed and 2 ml fractions were collected. Proteins



present in each fraction were precipitated with trichloroacetic acid. The distribution of Bax or Drp1 was analyzed by immunoblotting.

**Construction of expression plasmids for Drp1 mutants.** The N-terminal deletion construct of Drp1 was made by PCR amplification of the Drp1 ORF cloned in pET29a using specific primers (5'-GGA ATT CCA TAT GAG CTC AGT GCT AGA AAG C-3' and 5'-CCG CTC GAG CCA AAG ATG AGT CTC CCG GAT-3') followed by ligation of the restriction enzyme digested PCR product (NdeI/XhoI) into prelinearised pET29a.

Site directed mutagenesis was performed using a QuickChange Site-Directed Mutagenesis kit (Stratagene) according to manufacturer's instructions. The primers used for the site directed mutations were:

Drp1 K38A (5'-GCAGAGCAGCGGAGCGAGCTCAGTGCTAGAAAGC-3' and 5'-GCTTTCTAGCACTGAGCTCGCTCCGCTGCTGCTCTGC-3') Drp1 T59A (5'-GGT ACT GGA ATT GTC GCC CGG AGA CCT CTC-3' and 5'-GAG AGG TCT CCG GGC GAC AAT TCC AGT ACC-3'), Drp1 G149A (5'-CTT GTG GAT TTG CCA GCA ATG ACC AAG GTG CCT G-3' and 5'-CAG GCA CCT TGG TCA TTG CTG GCA AAT CCA CAA G-3'), Drp1 K216A (5'-CCT AGC TGT AAT CAC TGC ACT TGA TCT CAT GGA TG-3' and 5'-CAT CCA TGA GAT CAA GTG CAG TGA TTA CAG CTA GG-3'), Drp1 R201A (5'-CAC TTA AAA TTT CAG CAG AGG TAG ATC CAG-3' and 5'-CTG GAT CTA CCT CTG CTG AAA TTT TAA GTG-3'), Drp1 R247A (5'-GGA GTA GTT AAC GCG AGC CAG CTA GA-3' and 5'-TCT AGC TGG CTC GCG TTA ACT ACT CC-3'), Drp1 R247E (5'-ATT GGA GTA GTT AAC GAG AGC CAG

CTA GAT AT-3' and 5'-ATA TCT AGC TGG CTC TCG TTA ACT ACT CCA AT-3'), Drp1 K255A (5'-GCT AGA TAT TAA CAA CGC GAA GAG TGT AAC TG-3' and 5'-CAG TTA CAC TCT TCG CGT TGT TAA TAT CTA GC-3'), Drp1 K256A (5'-CAT ATT AAC AAC AAG GCG AGT GTA ACT GAT T-3' and 5'-AAT CAG TTA CAC TCG CCT TGT TGT TAA TAT G-3'), Drp1 R255G (5'-GCT AGA TAT TAA CAA CGA GAA GAG TGT AAC-3' and 5'-CAG TTA CAC TCT TCT CGT TGT TAA TAT CTA GC-3') and Drp1 R256G (5'-CAT ATT AAC AAC AAG GAG AGT GTA ACT GAT T-3' and 5'-GCT AGA TAT TAA CAA CGC GAA GAG TGT AAC TG-3'). The constructs were sequenced to verify the mutations.

**Composition of KCl buffer.** Unless otherwise stated the KCl buffer was made of 125 mM KCl, 2 mM MgCl<sub>2</sub>, 5 mM KH<sub>2</sub>PO<sub>4</sub>, 10 mM HEPES, pH 7.4

**In vitro Bax oligomerization assay.** Bax oligomerization was assayed as described previously (Lucken-Ardjomande et al., 2008) with some modifications. Unless otherwise stated, liposomes (840 μM lipids composed of 54 mol% PC, 26 mol% CL and 20 mol% PE) were resuspended in 200 μl KCl buffer before addition of ATP and proteins, respecting the following order: cytosolic extracts, Drp1, then ATP (2.5 mM), Bax (50 nM) and tBid (10 nM). The suspension was incubated at 30°C for 30 min without agitation. Liposomes were then ultracentrifuged at 100'000 g for 30 min at 15°C, resuspended in KCl buffer and incubated with trypsin (0.17 mg/ml) for 2 h at 30°C. Reactions were stopped with trypsin inhibitor (1.4 mg/ml, Sigma). Bax resistant to

trypsin digestion was analyzed by immunoblotting using a Bax antibody from BD-Pharmingen.

A '2 step' Bax activation assay was used to monitor purification of Bax activating proteins from brain cytosolic extracts. Fractions from the S Sepharose (1 mg) or size exclusion chromatography (100  $\mu$ g) were incubated with liposomes for 1 h under rotary shaking at room temperature, centrifuged at 100'000 g for 30 min at 15°C and resuspended by sonication in 200  $\mu$ l KCl buffer. ATP (2.5 mM), recombinant Bax (50 nM) and tBid (10 nM) were sequentially added to the proteoliposomes before incubation at 30°C for 30 min. Liposomes and Bax were then processed as described above.

**Aggregation of liposomes.** Liposomes were incubated in 100  $\mu$ l KCl buffer in the presence of 2.5 mM ATP and the WT or mutant Drp1 proteins for 30 min at 30°C. 700  $\mu$ l KCl buffer were then added to the liposome suspension before determination of the turbidity at 450 nm. Values represent the difference between OD<sub>450</sub> of the liposome suspension incubated in the presence of proteins and OD<sub>450</sub> in the absence of proteins. Statistical significance was assessed using Student's *t*-test (unpaired, two-tailed).

**Hemifusion analyzed by FACS.** PC/PE/CL liposomes containing Rhodamine-PE (0.2%, Invitrogen) or Bodipy FL C5 HPC (0.4%, Invitrogen) were prepared and mixed in a 1:1 ratio. Liposomes (2.75 mg/ml) were then incubated without or with ATP (2.5 mM), Drp1 proteins (0.2, 1 or 2  $\mu$ M) for 30 min at room temperature. Samples were then analyzed using a FACScalibur system. Statistical significance was assessed using paired Student's *t*-tests.

**Drp1 GTPase activity.** The GTPase activity of WT and mutant Drp1 was assayed using a colorimetric assay as described previously (Leonard et al., 2005). Briefly, 1.5  $\mu$ M Drp1 was added to 1.25 mM GTP for 30 min at 30°C in 200  $\mu$ l KCl buffer, without phosphate. 5  $\mu$ l of the solution were then added to 200  $\mu$ l Malachite Green stock solution (500  $\mu$ M Malachite Green, Sigma, 10 mM ammonium molybdate in 1 N HCl) in microtiter wells and the absorbance at 650 nm was determined using a microplate reader.

**Cell culture, cell transfection and apoptosis induction.** HeLa cells (European Collection for Cell Cultures) were grown in DME supplemented with 10% FCS, 100 u/ml penicillin, 0.1 mg/ml streptomycin, 2 mM glutamine, and maintained in 5% CO<sub>2</sub> at 37°C. HeLa cells were transfected with various plasmids encoding Drp1, Drp1 mutants or Bcl-2 using calcium phosphate except for the experiments aiming at determining levels of Bax oligomerization for which a very high transfection efficiency was required. For this, we used the Microporator system (Digital Bio, Axon lab) which allows to achieve transfection efficiencies > 80% for HeLa cells.

Apoptosis was induced with a UV Stratalinker 2400 apparatus (60 mJ/cm<sup>2</sup>, Stratagene) or with Actinomycin D (3  $\mu$ M, Sigma). Apoptotic cells were labeled with Annexin V (BD Biosystems) and counted by flow cytometry as described previously (Lucken-Ardjomande et al., 2008).

**Immunoblotting and immunocytochemistry.** Samples were separated in polyacrylamide gels and transferred to Hybond-P membranes (Amersham Pharmacia).

Immunoblotting was performed with the following antibodies: Bax (BD-Pharmingen, 554104 for immunoblotting), Bid (R&D systems, AF 860), Drp1 (BD-Biosciences), Prohibitin (Thermoscientific, Ab-1, MS261), GAPDH (Abcam, Ab8245), hFis1 (Alexis, ALX-210-907), mHsp70 (MA3-028, Thermoscientific), Tom 20 (FL-145, Santa-Cruz Biotechnology), Bcl-XL (B22630, BD transduction laboratories), Hsp90 (a kind gift of Dr O. Toft, Mayo Clinic), Actin (AC-40 Sigma).

Immunocytochemistry for cytochrome c was performed with a monoclonal antibody from BD-Pharmingen.

**Determination of Bax oligomerization during apoptosis using the trypsin assay.**

Mitochondria were isolated from control and apoptotic cells as described previously (Parone et al., 2006). Briefly, HeLa cells were resuspended in MB buffer (210 mM mannitol, 70 mM sucrose, 1 mM EDTA, 10 mM Hepes-KOH, pH 7.4), broken by five passages through a 25G1 0.5 × 25 needle fitted on a 2-ml syringe and the suspension was centrifuged at 10'000 g for 10 min at 4°C.

Mitochondria (4 µg/µl in KCl buffer) were treated with trypsin (0.17 mg/ml) for 90 min. Reaction was stopped with trypsin inhibitor (1.4 mg/ml, Sigma) and the fraction of Bax resistant to trypsin digestion was analyzed by immunoblotting using a Bax antibody from BD-Pharmingen.

**Determination of Bax oligomerization by cross-linking.** Mitochondria were purified from control and apoptotic cells and incubated in the presence of BS<sup>3</sup> (Bis-sulfosuccinimidyl-suberate) and DSS (Disuccinimidyl suberate) at a concentration of 2

mM for 30 min before addition of Tris-HCl, pH 8 to stop the reaction. Mitochondria were lysed before analysis of Bax by immunoblotting.

### **Statistical analysis**

Data are presented as means  $\pm$  s.e.m unless otherwise stated. Statistical significance was assessed using unpaired, two-tailed Student's *t*-test. Differences were considered statistically significant at  $p < 0.05$ .

### **References**

Desagher, S., Osen-Sand, A., Nichols, A., Eskes, R., Montessuit, S., Lauper, S., Maundrell, K., Antonsson, B., and Martinou, J.C. (1999). Bid-induced conformational change of Bax is responsible for mitochondrial cytochrome c release during apoptosis. *J Cell Biol* *144*, 891-901.

Eskes, R., Antonsson, B., Osen-Sand, A., Montessuit, S., Richter, C., Sadoul, R., Mazzei, G., Nichols, A., and Martinou, J.-C. (1998). Bax-induced cytochrome c release from mitochondria is independent of the permeability transition pore but highly dependent on Mg<sup>2+</sup> ions. *J Cell Biol* *143*, 217-224.

Leonard, M., Song, B.D., Ramachandran, R., and Schmid, S.L. (2005). Robust colorimetric assays for dynamin's basal and stimulated GTPase activities. *Methods Enzymol* *404*, 490-503.

Lucken-Ardjomande, S., Montessuit, S., and Martinou, J.C. (2008). Bax activation and stress-induced apoptosis delayed by the accumulation of cholesterol in mitochondrial membranes. *Cell Death Differ* 15, 484-493.

Parone, P.A., James, D.I., Da Cruz, S., Mattenberger, Y., Donze, O., Barja, F., and Martinou, J.C. (2006). Inhibiting the mitochondrial fission machinery does not prevent Bax/Bak-dependent apoptosis. *Mol Cell Biol* 26, 7397-7408.

Roucou, X., Montessuit, S., Antonsson, B., and Martinou, J.C. (2002). Bax oligomerization in mitochondrial membranes requires tBid (caspase-8-cleaved Bid) and a mitochondrial protein. *Biochem J* 368, 915-921.

## Supplementary figure 1

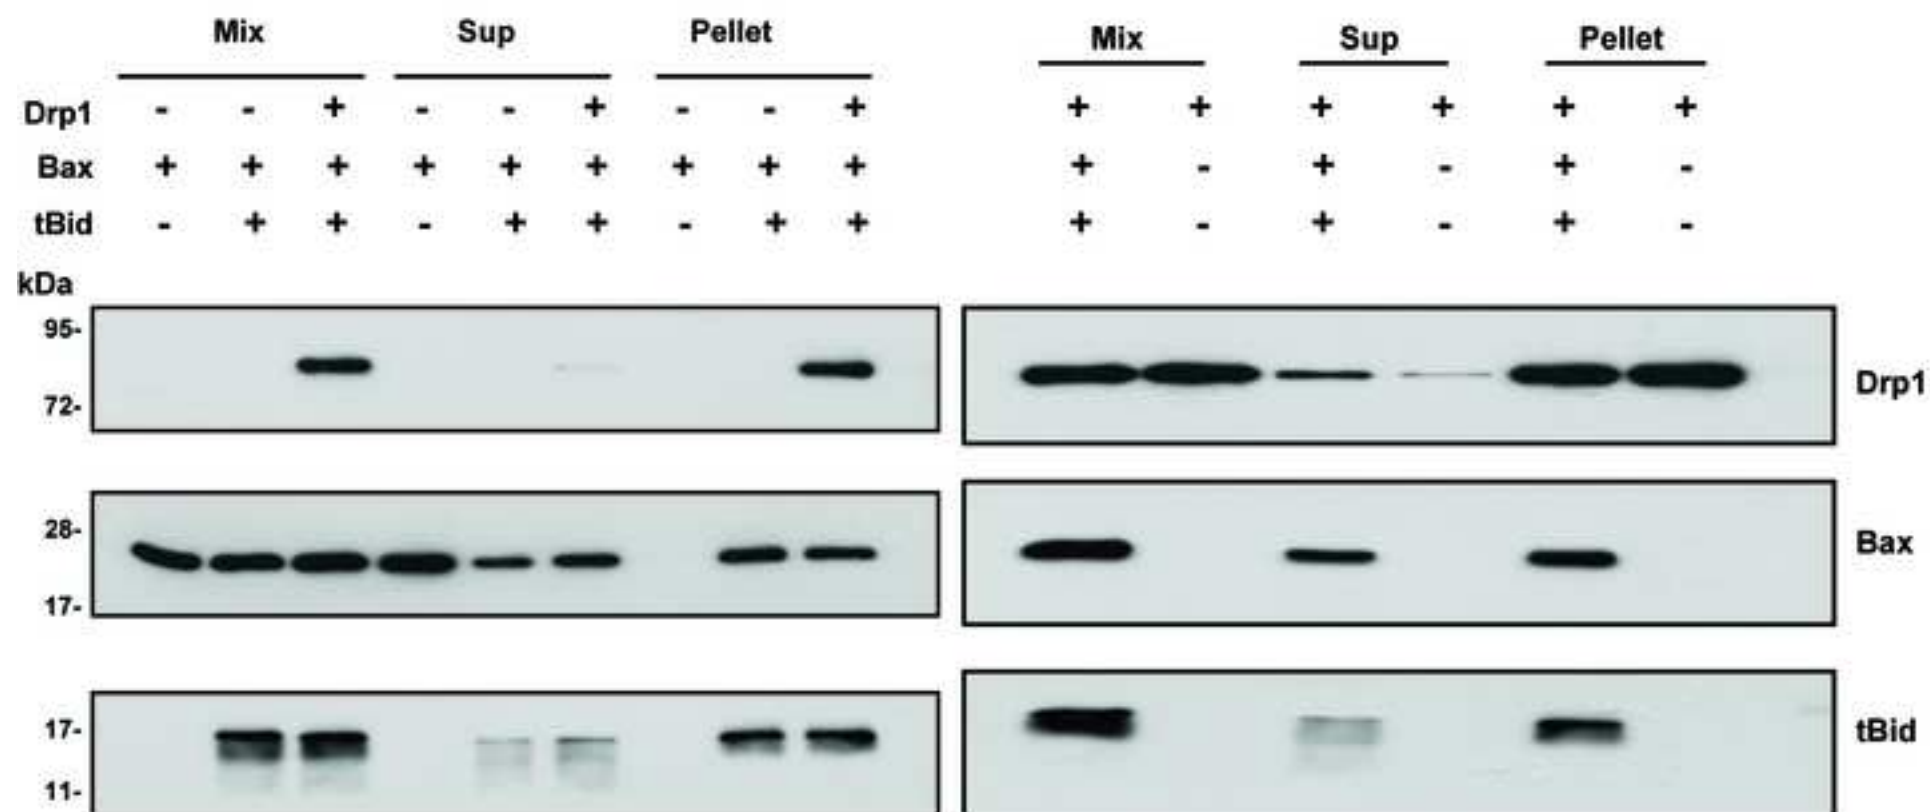





Supplementary figure 3

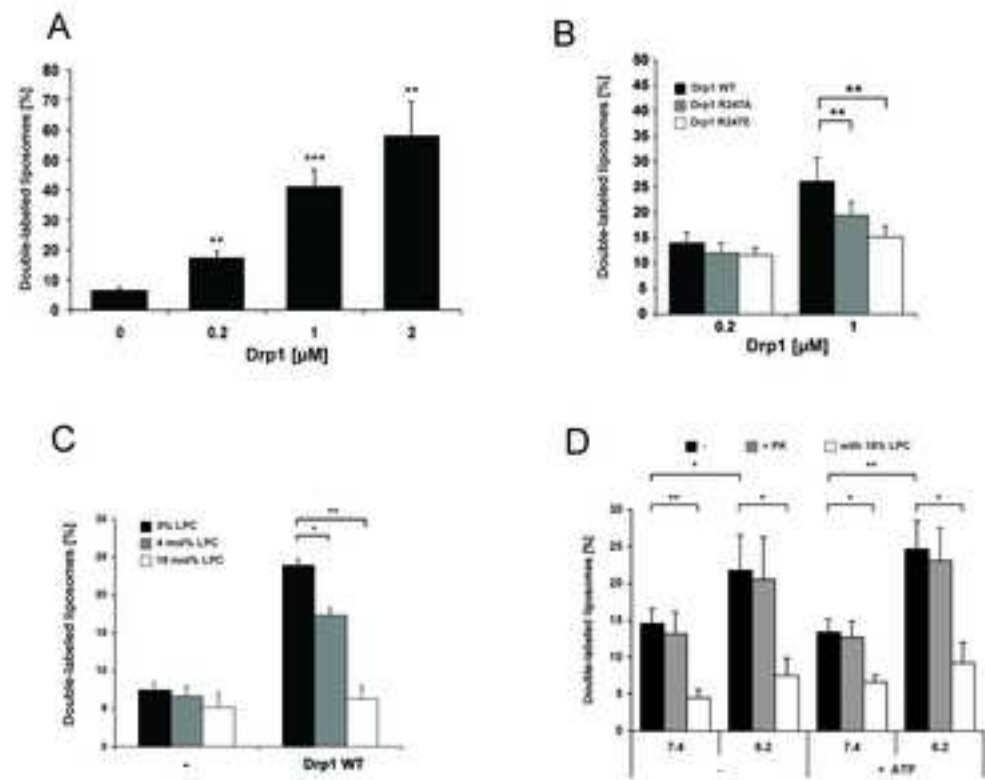

# Supplementary figure 4

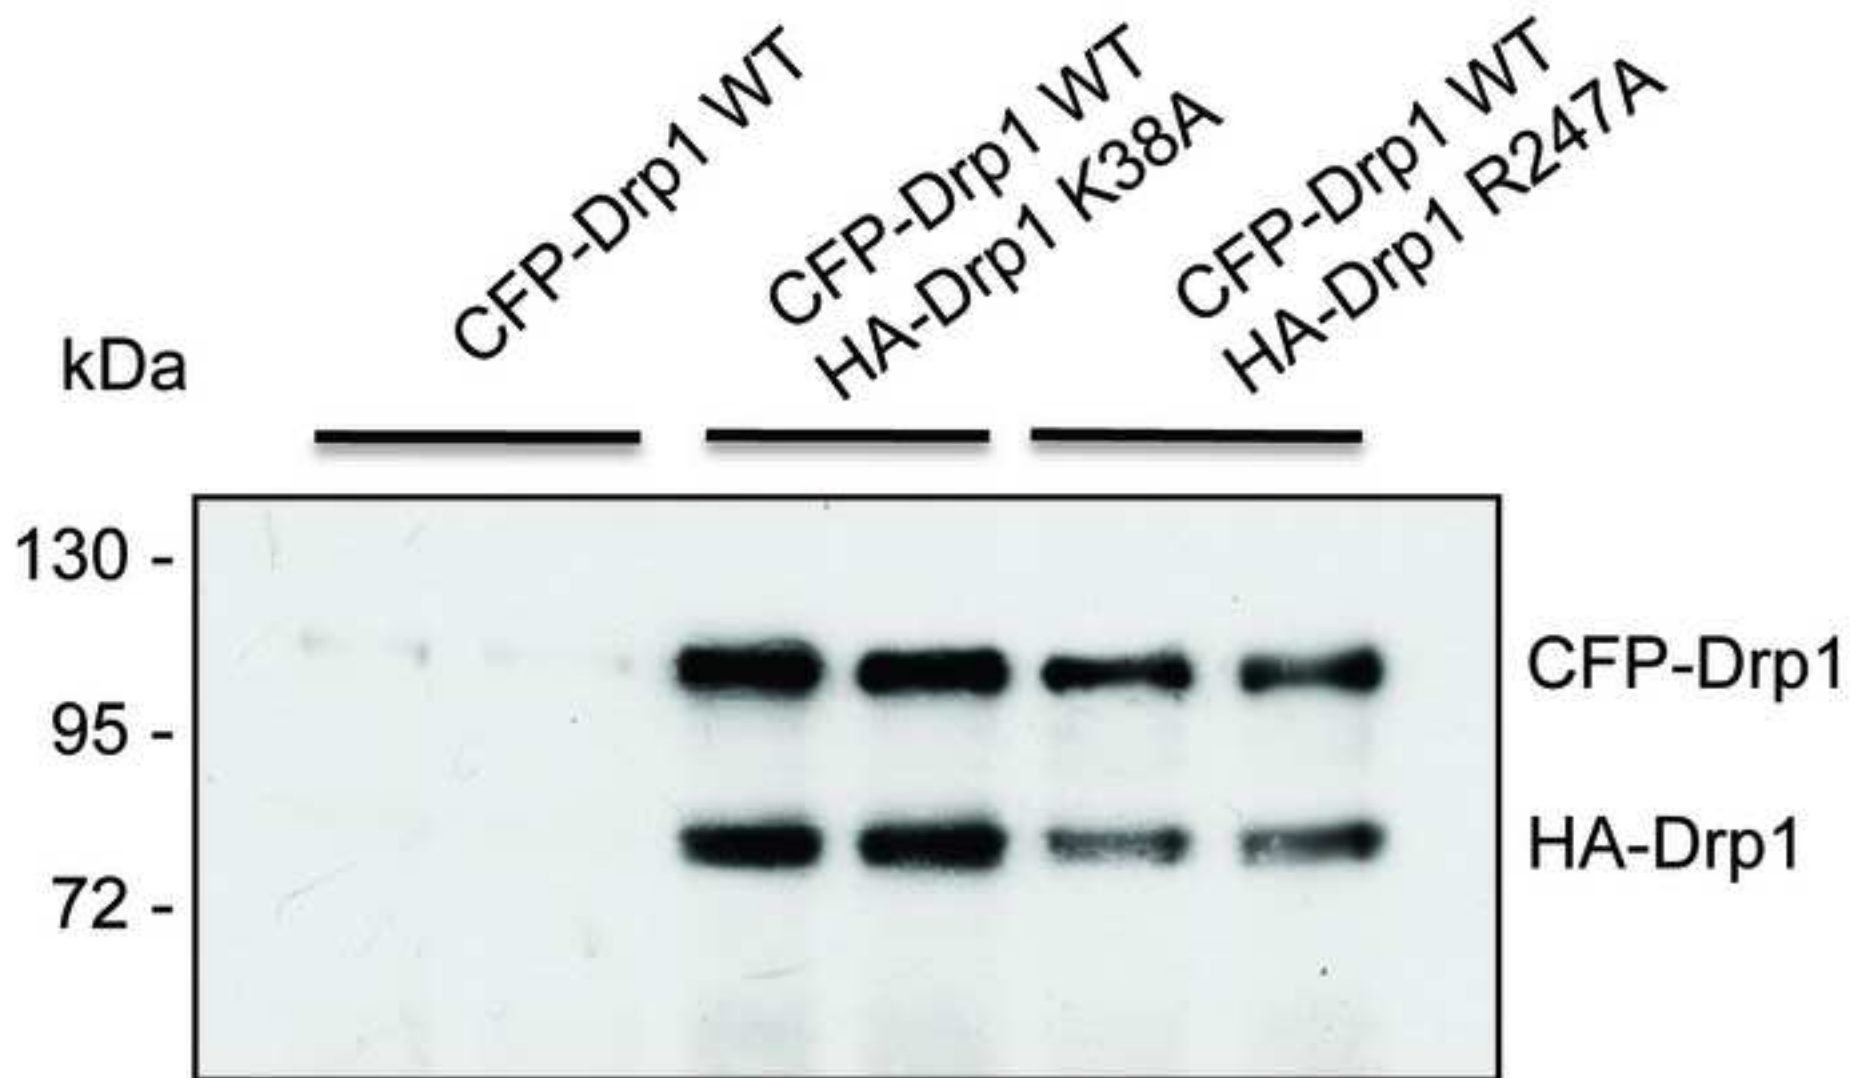

Supplementary figure 5

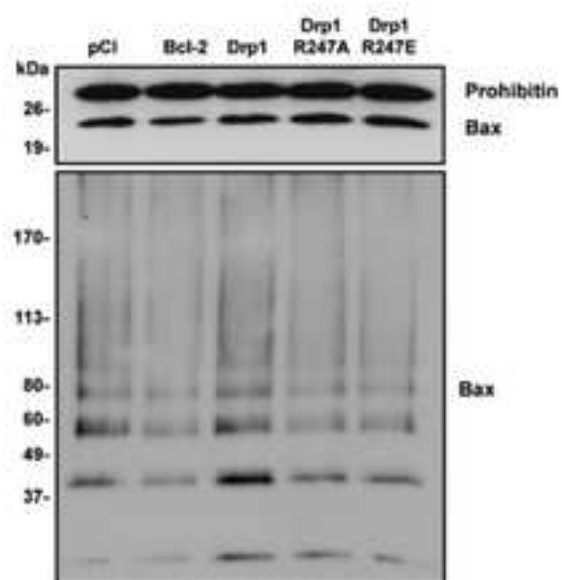

Supplement: NIHMS594768-supplement-01.pdf [file NIHMS594768-supplement-01.pdf]
